# Supplementary material
Source: publisher figshare collection journal article supplement (https://acs.figshare.com/ndownloader/files/4218286)
Supplement: Supplementary file 1 [file 4218286]

# Supporting Information

## Photovoltaic Effects of the CdS and PbS Quantum Dots Encapsulated in Zeolite Y

Hyun Sung Kim, Nak Cheon Jeong, and Kyung Byung Yoon\*

### Contents

- SI-1. Local pH Variation in Zeolite-Y Depending on the Number of  $H^+$  in A Unit Cell.
- S-2. Fabrication of the photovoltaic cells
- SI-3. Effect of ITO glass on the growth of zeolite films..
- SI-4. Diffuse-reflectance UV-vis spectra of  $(2NH_4^+, CdS)_{6.3}Y_{ITO}$  after ODC coating, after exposure to air, and after immersion in the electrolyte solution
- SI-5. Stability of  $(CdS)_{6.3}Y_{ITO}$  and  $(PbS)_{6.7}Y_{ITO}$  after immersion in the electrolyte solution confirmed by X-ray diffraction intensities.
- SI-6. Stability of  $(CdS)_{6.3}Y_{ITO}$  and  $(PbS)_{6.7}Y_{ITO}$  after immersion in the electrolyte solution confirmed by AFM investigation of the surfaces.
- SI-7. Characterization of  $(PbS)_{6.7}Y_{ITO}$  with transmission electron microscopy (TEM).
- SI-8. Transmittance spectra of  $(Na)_{59}Y_{ITO}$  and  $(CdS)_nY_{ITO}$  ( $n = 3.2, 4.3, \text{ and } 6.3$ )
- SI-9. Extrapolated plots of IPCE (A) and APCE (B) with respect to the loaded number of CdS per unit cell
- SI-10. Estimation of band gap energies of interconnected QDs in  $(CdS)_{6.3}Y_{ITO}$  and  $(PbS)_{6.7}Y_{ITO}$
- SI-11. Basis for the calculation of the volume percent of 6.3 CdS in a unit cell.
- SI-12. Calculation of the interdot distance between the interconnected CdS QDs in  $(CdS)_{6.3}Y_{ITO}$ .
- SI-13. Electrolyte salt occlusion into zeolite-Y films upon immersion into the electrolyte solution
- SI-14. Laser scanning confocal microscope (LSCM) images of the fluorescein-stained zeolite Y films
- SI-15 Photovoltaic characteristics of  $(CdS)_{6.3}Y_{ITO} \mid Pt_{FTO}$  with various thickness.
- SI-16. Photovoltaic characteristics of  $(CdS)_{6.3}Y_{ITO} \mid Pt_{FTO}$  under different light intensities.

# **SI-1. Local pH Variation in Zeolite-Y Depending on the Number of H<sup>+</sup> in A Unit Cell.**

Table SI-1. Local pH variation with changing the number of H<sup>+</sup> ion in a unit cell.

| $V_{UC} (m^3)^a$       | $N_{H^+}/V_{UC}^b$ | $N_{H^+}/1L^c$        | $M_{H^+}^d$ | pH     |
|------------------------|--------------------|-----------------------|-------------|--------|
| $1.51 \times 10^{-26}$ | 1                  | $6.64 \times 10^{22}$ | 0.110       | 0.958  |
|                        | 2                  | $1.33 \times 10^{23}$ | 0.220       | 0.657  |
|                        | 3                  | $1.99 \times 10^{23}$ | 0.330       | 0.481  |
|                        | 4                  | $2.65 \times 10^{23}$ | 0.440       | 0.356  |
|                        | 5                  | $3.32 \times 10^{23}$ | 0.551       | 0.259  |
|                        | 6                  | $3.98 \times 10^{23}$ | 0.661       | 0.180  |
|                        | 7                  | $4.65 \times 10^{23}$ | 0.771       | 0.113  |
|                        | 8                  | $5.31 \times 10^{23}$ | 0.881       | 0.055  |
|                        | 9                  | $5.97 \times 10^{23}$ | 0.991       | 0.004  |
|                        | 10                 | $6.64 \times 10^{23}$ | 1.102       | -0.042 |
|                        | 11                 | $7.30 \times 10^{23}$ | 1.212       | -0.084 |
|                        | 12                 | $7.96 \times 10^{23}$ | 1.322       | -0.121 |
|                        | 13                 | $8.63 \times 10^{23}$ | 1.433       | -0.156 |
|                        | 14                 | $9.29 \times 10^{23}$ | 1.543       | -0.188 |
|                        | 15                 | $9.95 \times 10^{23}$ | 1.653       | -0.218 |
|                        | 16                 | $1.06 \times 10^{24}$ | 1.763       | -0.246 |
|                        | 17                 | $1.13 \times 10^{24}$ | 1.873       | -0.273 |
|                        | 18                 | $1.19 \times 10^{24}$ | 1.984       | -0.297 |
|                        | 19                 | $1.26 \times 10^{24}$ | 2.094       | -0.321 |
|                        | 20                 | $1.33 \times 10^{24}$ | 2.204       | -0.343 |
|                        | 21                 | $1.39 \times 10^{24}$ | 2.314       | -0.364 |
|                        | 22                 | $1.46 \times 10^{24}$ | 2.424       | -0.385 |
|                        | 23                 | $1.53 \times 10^{24}$ | 2.535       | -0.404 |

<sup>a</sup>Volume of a unit cell. <sup>b</sup>Number of protons in unit cell volume. <sup>c</sup>Number of protons in 1 L. <sup>d</sup>Molar concentration of proton.

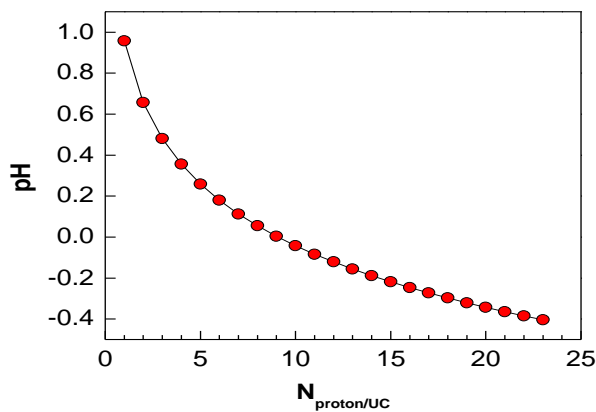

**Figure SI-1-1.** Plot of the calculated local pH with respect to the number of H<sup>+</sup> ion in a unit cell of zeolite-Y.

## S-2. Fabrication of the photovoltaic cells

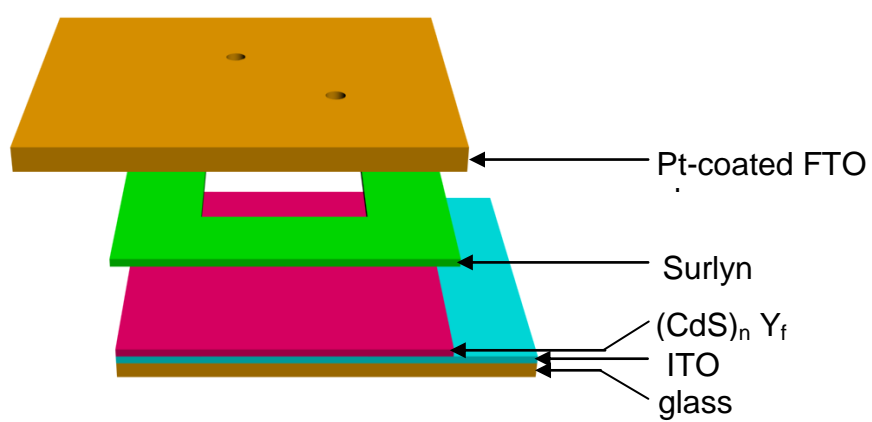

**Figure SI-2-1.** Schematic illustration of the components for the photovoltaic cell fabricated in this study.

**SI-3. Effect of ITO glass on the growth of zeolite films..**

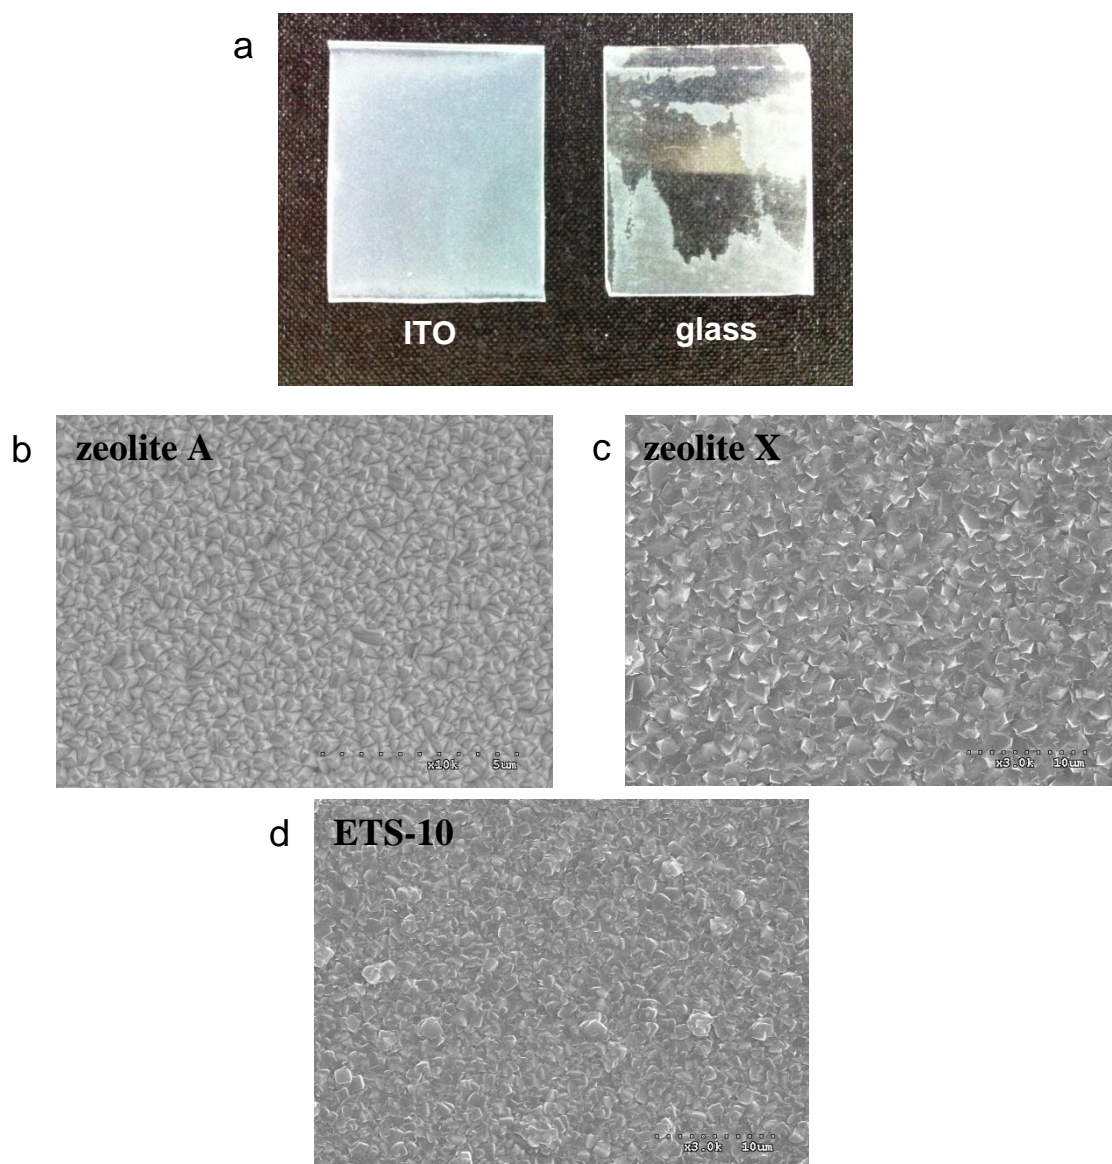

**Figure SI-3-1.** Photograph (a) and SEM images (b-d) showing the effect of ITO on the growth of zeolite films.

**SI-4. Diffuse-reflectance UV-vis spectra of  $(2\text{NH}_4^+, \text{CdS})_{6.3}\text{Y}_{\text{ITO}}$  after ODC coating, after exposure to air, and after immersion in the electrolyte solution**

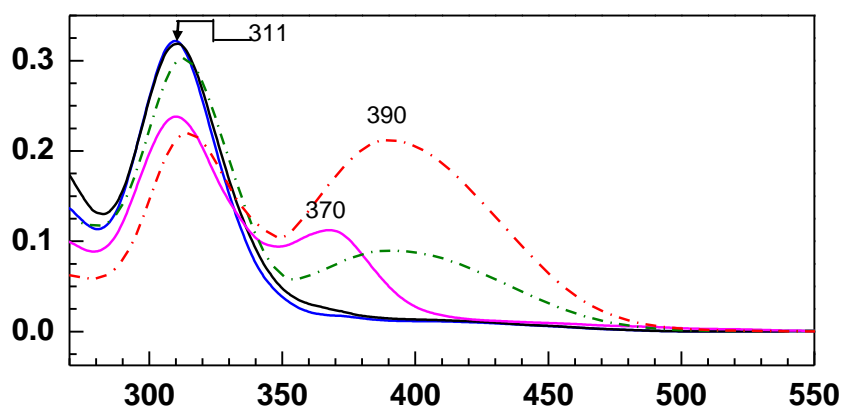

**Figure SI-4-1.** Diffuse-reflectance UV-vis spectra of  $(2\text{NH}_4^+, \text{CdS})_{6.3}\text{Y}_{\text{ITO}}$  after three different types of treatment: ODC coating (black solid), after exposure to the atmosphere for 24 h (blue solid), and after immersion in the electrolyte solution for 12 h (pink solid), respectively. For comparison, the corresponding UV-vis spectra of  $(2\text{H}^+, \text{CdS})_{6.3}\text{Y}_{\text{ITO}}$  after exposure to the atmosphere for 24 h (green dash dot) and after immersion in the electrolyte solution for 12 h (red dash and dot) are also shown.

**SI-5. Stability of  $(\text{CdS})_{6.3}\text{Y}_{\text{ITO}}$  and  $(\text{PbS})_{6.7}\text{Y}_{\text{ITO}}$  after immersion in the electrolyte solution confirmed by X-ray diffraction intensities.**

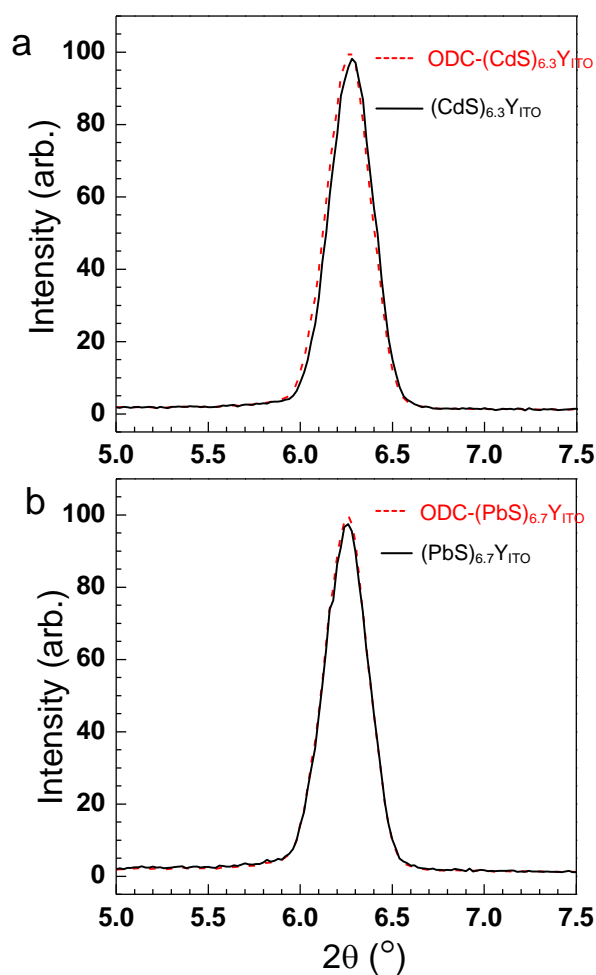

**Figure SI-5-1.** X-ray diffraction peaks at  $6.25^{\circ}$  arising from the diffraction by (111) plane of  $(\text{CdS})_{6.3}\text{Y}_{\text{ITO}}$  (a) and  $(\text{PbS})_{6.7}\text{Y}_{\text{ITO}}$  (b) after removal from the electrolyte solution for 12 h compared with those of the corresponding  $\text{ODC}-(\text{CdS})_{6.3}\text{Y}_{\text{ITO}}$  (a) and  $\text{ODC}-(\text{PbS})_{6.7}\text{Y}_{\text{ITO}}$  (b).

SI-6. Stability of  $(\text{CdS})_{6.3}\text{Y}_{\text{ITO}}$  and  $(\text{PbS})_{6.7}\text{Y}_{\text{ITO}}$  after immersion in the electrolyte solution confirmed by AFM investigation of the surfaces.

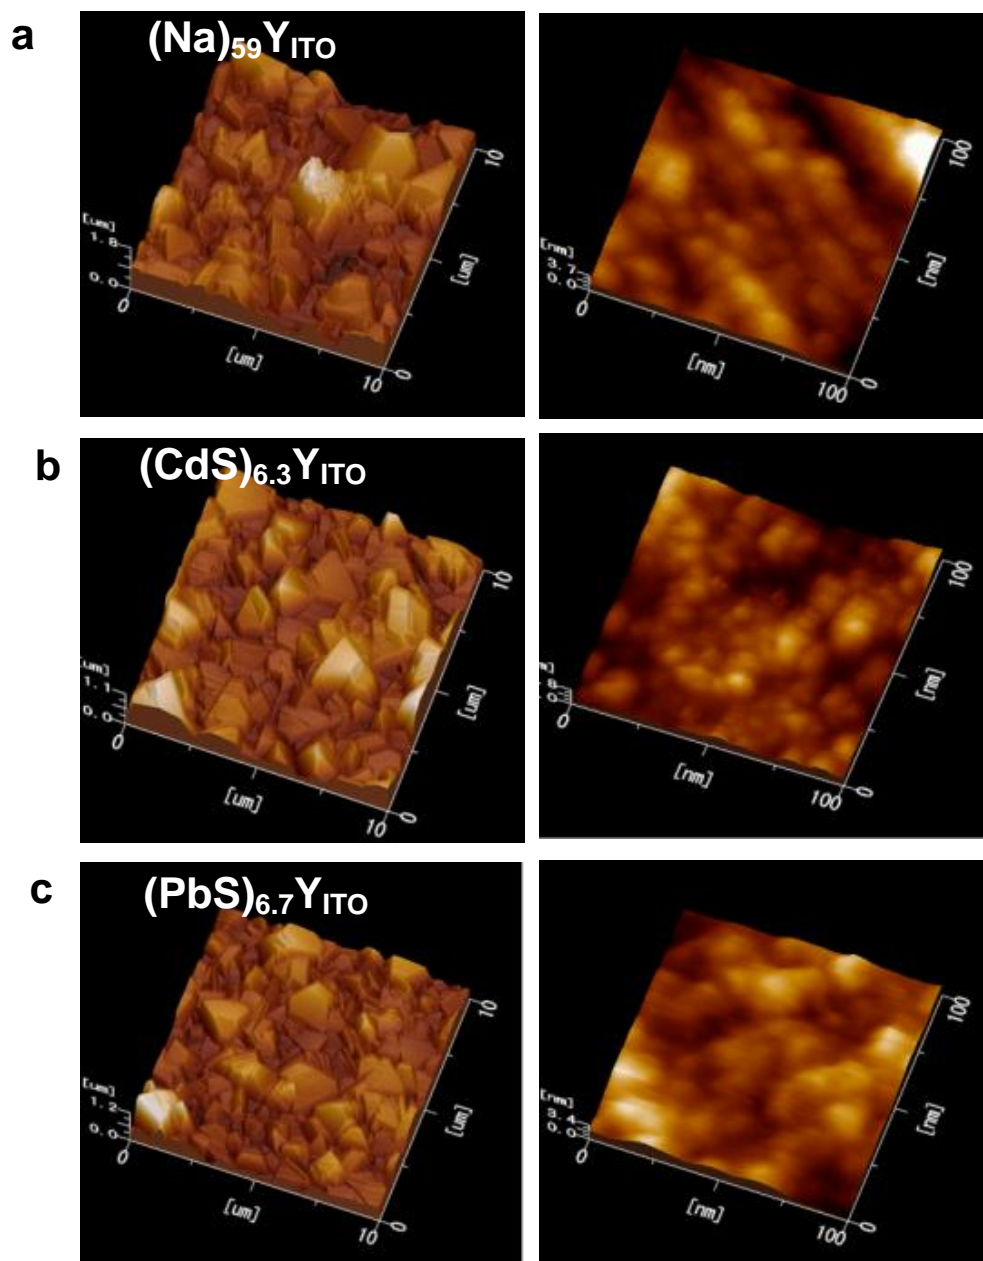

**Figure SI-6-1.** AFM images of  $(\text{Na})_{59}\text{Y}_{\text{ITO}}$  (a),  $(\text{CdS})_{6.3}\text{Y}_{\text{ITO}}$  (b), and  $(\text{PbS})_{6.7}\text{Y}_{\text{ITO}}$  (c) in two different scales,  $10 \times 10 \mu\text{m}^2$  (left) and  $100 \times 100 \text{ nm}^2$  (right).

## SI-7. Characterization of (PbS)<sub>6.7</sub>Y<sub>ITO</sub> with transmission electron microscopy (TEM).

For the TEM analysis, the (PbS)<sub>6.7</sub>Y films were peeled off the ITO glass by scraping them with a razor blade in a glove box and the surfaces of the fragments were coated with ODC to preserve the QDs as such. The TEM images of the ODC-coated (PbS)<sub>6.7</sub>Y film fragments showed only lattice fringes of zeolite Y framework but not the isolated QDs (Figure SI-7-1, a and b). However, the TEM images of the ODC-coated fragments of (PbS)<sub>6.7</sub>Y film after immersion in the electrolyte solution for 12 h (Figure SI-7-1, c and d) show the presence of ~5 nm sized QDs on the surface, consistent with the observation of the exciton absorption in the diffuse reflectance UV-vis spectrum (Figure 2f in the text) and the globular PbS QDs observed by AFM (SI-6). The absence of the lattice fringes of the zeolite-Y framework on the surface further shows that the thin surface layers of (PbS)<sub>6.7</sub>Y<sub>ITO</sub> underwent framework decomposition during the formation of mesosized PbS QDs. In contrast to the surface, the internal areas of the (PbS)<sub>6.7</sub>Y<sub>ITO</sub> film remained intact (Figure SI-7-1, e) indicating that the structural decomposition accompanying the formation of PbS is limited to the very shallow (10-20 nm) surfaces of (PbS)<sub>6.7</sub>Y<sub>ITO</sub> film.

For comparison, we also obtained TEM images of ODC-coated 100-nm sized (PbS)<sub>6.7</sub>Y crystals before (Figure SI-7-1, f and g) and after (Figure SI-7-1, h-j) exposure to the electrolyte solution for 12 h. The TEM images of ODC-coated (PbS)<sub>6.7</sub>Y crystals, which were not exposed to the electrolyte solution, showed only the lattice fringes of the zeolite-Y framework but not the isolated PbS QDs. In contrast, the TEM images of ODC-coated (PbS)<sub>6.7</sub>Y crystals which were exposed to the electrolyte solution showed the presence of mesosized PbS QDs in the entire mass and the zeolite Y framework has undergone complete framework destruction. This also shows that, for some unrevealed reasons, the (PbS)<sub>6.7</sub>Y<sub>ITO</sub> is much more stable in the electrolyte solution than the individual particles.



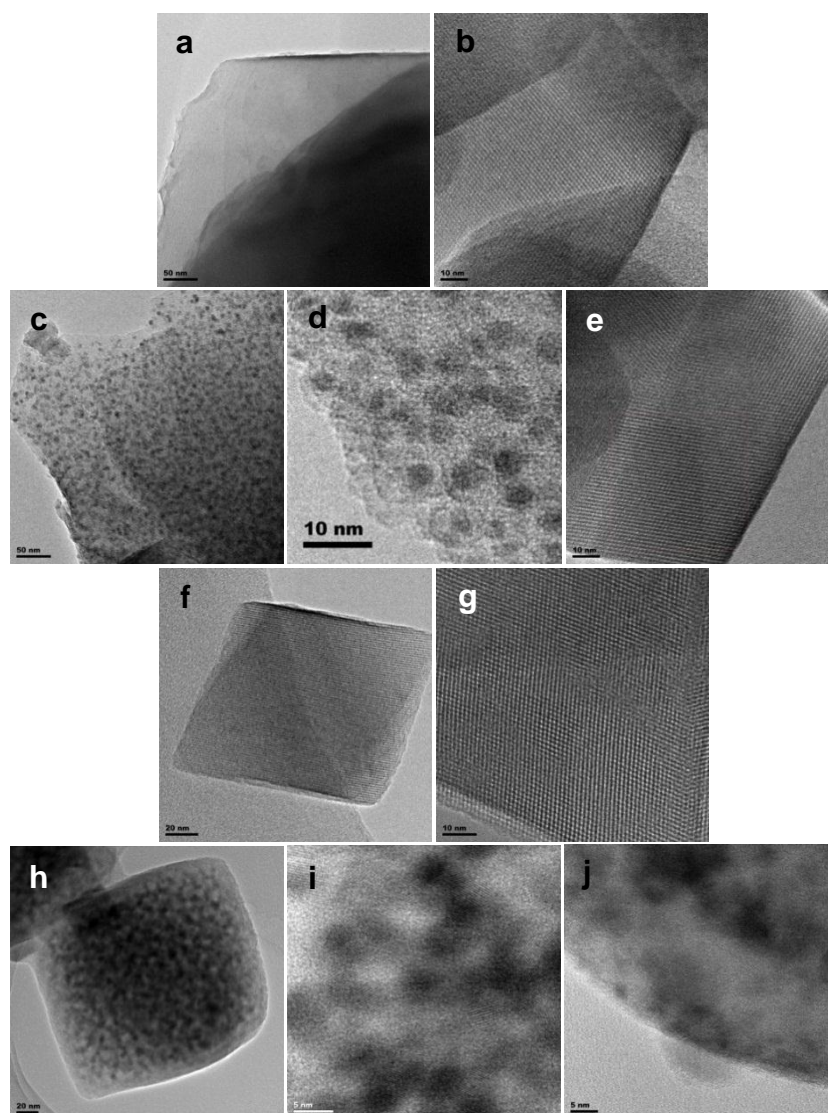

**Figure SI-7-1.** TEM images of zeolite films and zeolite crystals.  $(\text{PbS})_{6.7}\text{Y}_{\text{ITO}}$  in different magnifications (a, b), a surface layer of  $(\text{PbS})_{6.7}\text{Y}_{\text{ITO}}$  after immersion in the electrolyte solution for 12 h in two different magnifications (c, d), a deeper layer of  $(\text{PbS})_{6.7}\text{Y}_{\text{ITO}}$  after immersion in the electrolyte solution for 12 h (e), 100-nm sized ODC- $(\text{PbS})_{6.7}\text{Y}$  crystals (f, g), 100-nm sized ODC- $(\text{PbS})_{6.7}\text{Y}$  crystals after immersion in the electrolyte solution for 12 h in different magnifications (h-j).

**SI-8. Transmittance spectra of  $(\text{Na})_{59}\text{Y}_{\text{ITO}}$  and  $(\text{CdS})_n\text{Y}_{\text{ITO}}$  ( $n = 3.2, 4.3$ , and  $6.3$ )**

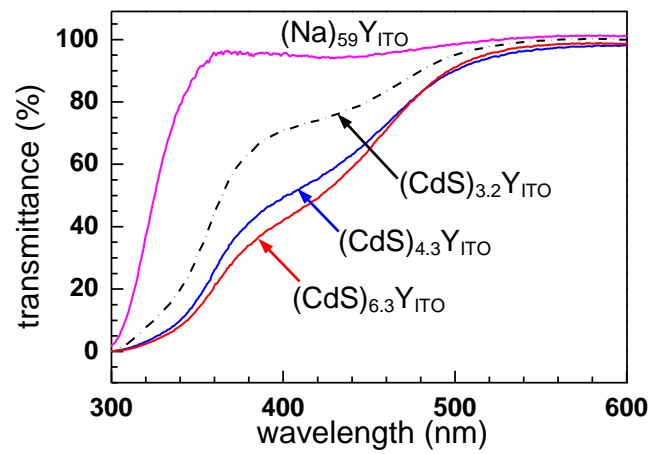

**Figure SI-8.** Transmittance spectra of  $(\text{Na})_{59}\text{Y}_{\text{ITO}}$  and  $(\text{CdS})_n\text{Y}_{\text{ITO}}$  ( $n = 3.2, 4.3$ , and  $6.3$ ) immersed in DMSO which is used as the index matching fluid.

**SI-9. Extrapolated plots of IPCE (A) and APCE (B) with respect to the loaded number of CdS per unit cell**

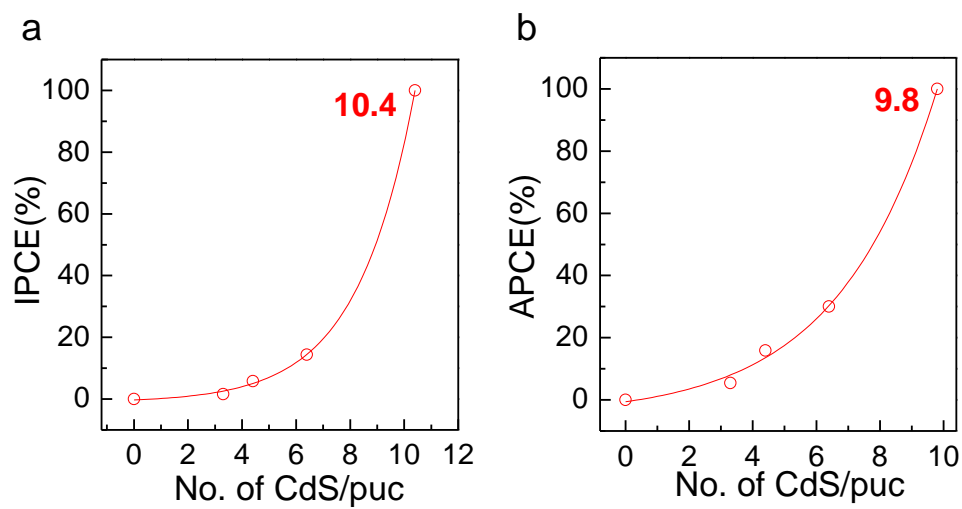

**Figure SI-9-1.** Plots of IPCE (a) and APCE (b) with respect to the loaded number of CdS per unit cell and the extrapolation.

**SI-10. Estimation of band gap energies of interconnected QDs in  $(\text{CdS})_{6.3}\text{Y}_{\text{ITO}}$  and  $(\text{PbS})_{6.7}\text{Y}_{\text{ITO}}$**

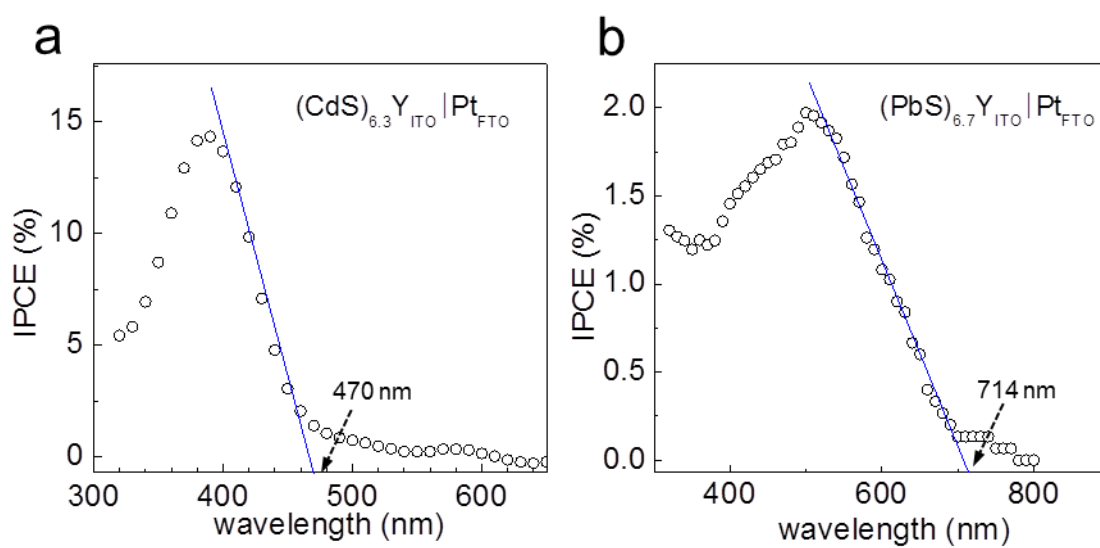

**Figure SI-10-1.** Estimation of band gap energies of interconnected QDs in  $(\text{CdS})_{6.3}\text{Y}_{\text{ITO}}$  (a) and  $(\text{PbS})_{6.7}\text{Y}_{\text{ITO}}$  (b).

**SI-11. Basis for the calculation of the volume percent of 6.3 CdS in a unit cell.**

(1) Number of CdS per unit cell = 6.3

(2) Density of CdS:  $4.82 \text{ g/cm}^3$

(3) Molecular weight of CdS:  $144.46 \text{ g/mole}$

(4) Weight of 6.3 CdS:  $1.51 \times 10^{-21} \text{ g}$

(5) Volume of 6.3 CdS:  $313 \text{ \AA}^3$

$$(1.51 \times 10^{-21} \text{ g})/V = 4.82 \text{ g/cm}^3$$

$$V = 313 \times 10^{-24} \text{ cm}^3 \quad (1 \text{ \AA}^3 = 10^{-24} \text{ cm}^3)$$

(6) Volume of a zeolite-Y unit cell:  $14,349 \text{ \AA}^3$

(7) Volume % of 6.3 CdS in a unit cell:  $(313/14,349) \times 100 = 2.2 \text{ (\%)}$

**SI-12. Calculation of the interdot distance between the interconnected CdS QDs in  $(\text{CdS})_{6.3}\text{Y}_{\text{ITO}}$ .**

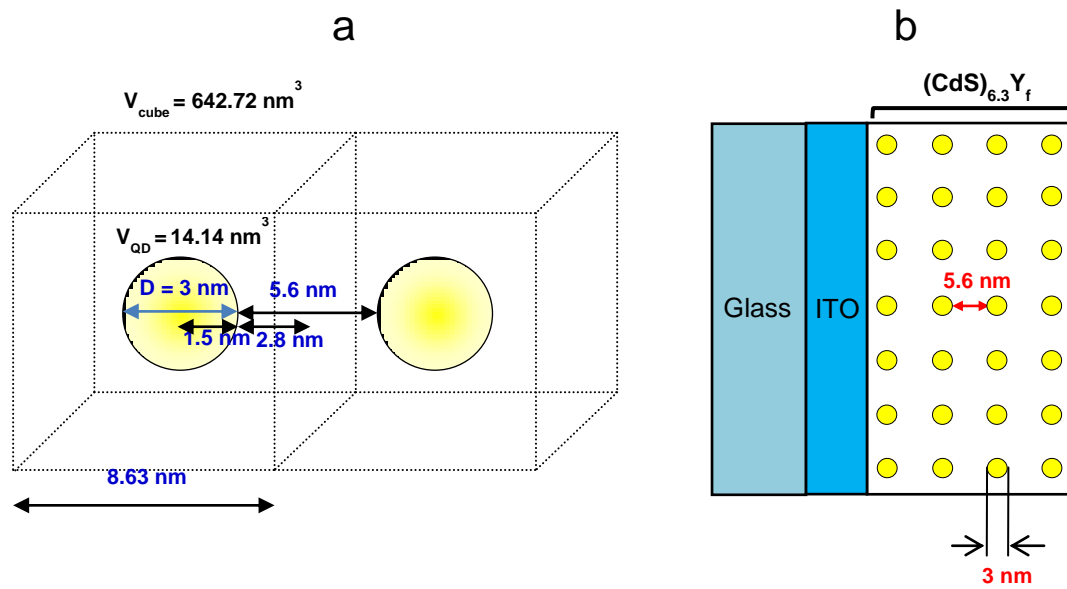

**Figure SI-12-1.** Schematic illustration of the basis for the calculation of the interdot distance between the interconnected CdS QDs in  $(\text{Cd})_{6.3}\text{Y}_{\text{ITO}}$  (a) and the 2D drawing of  $(\text{Cd})_{6.3}\text{Y}_{\text{ITO}}$  (B).

| $D_{\text{QD}} (\text{nm})$ | $r_{\text{QD}} (\text{nm})$ | $V_{\text{QD}} (\text{nm}^3)$ | $V_{\text{cube}} (\text{nm}^3)$ | Edge length (nm) | Inter QD $d_{\text{edge-to-edge}}$ |
|-----------------------------|-----------------------------|-------------------------------|---------------------------------|------------------|------------------------------------|
| 3.0                         | 1.5                         | 14.14                         | 642.72                          | 8.63             | 5.6                                |

### SI-13. Electrolyte salt occlusion into zeolite-Y films upon immersion into the electrolyte solution

**Table SI-13-1.** Compositions of Zeolite Y films After Immersion in Various Electrolytes Used in This Study.

| Electrolytes                              | Unit Cell Composition + Additional Salt                                                             |      |
|-------------------------------------------|-----------------------------------------------------------------------------------------------------|------|
| None                                      | $\text{Na}_{70.2}\text{Al}_{70.3}\text{Si}_{121.7}\text{O}_{384}$                                   | -    |
| $\text{Na}_2\text{S}$ (0.1M) + NaOH (1 M) | $\text{Na}_{70.2}\text{Al}_{70.3}\text{Si}_{121.7}\text{O}_{384} + (\text{Na}_{4.5}\text{S}_{0.7})$ | 0.1  |
| $\text{Na}_2\text{S}$ (0.1M)              | $\text{Na}_{70.2}\text{Al}_{70.3}\text{Si}_{121.7}\text{O}_{384} + (\text{Na}_{0.5}\text{S}_{0.8})$ | -    |
| NaOH (1M)                                 | $\text{Na}_{70.2}\text{Al}_{70.3}\text{Si}_{121.7}\text{O}_{384} + (\text{Na}_{3.8})$               | -    |
| NaI (0.1M) + NaOH (1 M)                   | $\text{Na}_{70.2}\text{Al}_{70.3}\text{Si}_{121.7}\text{O}_{384} + (\text{Na}_{4.6}\text{I}_{0.8})$ | 0.03 |
| NaI (0.1M)                                | $\text{Na}_{70.2}\text{Al}_{70.3}\text{Si}_{121.7}\text{O}_{384} + (\text{Na}_{1.0}\text{I}_{0.9})$ | -    |
| TBAI (0.1M) + TBAOH (1 M)                 | $\text{Na}_{70.2}\text{Al}_{70.3}\text{Si}_{121.7}\text{O}_{384}$                                   | 0.0  |
| TBAI (0.1M)                               | $\text{Na}_{70.2}\text{Al}_{70.3}\text{Si}_{121.7}\text{O}_{384}$                                   | -    |

#### Procedure

1.  $\text{Y}_{\text{ITO}}$  films with the size of  $2 \times 0.5 \text{ cm}^2$  were dipped into each electrolyte solution for 10 min.
2.  $\text{Y}_{\text{ITO}}$  films were washed with pure water for 3 second.
3. The surfaces were immediately dried by blowing strong  $\text{N}_2$  flow.

**SI-14. Laser scanning confocal microscope (LSCM) images of the fluorescein-stained zeolite Y films**

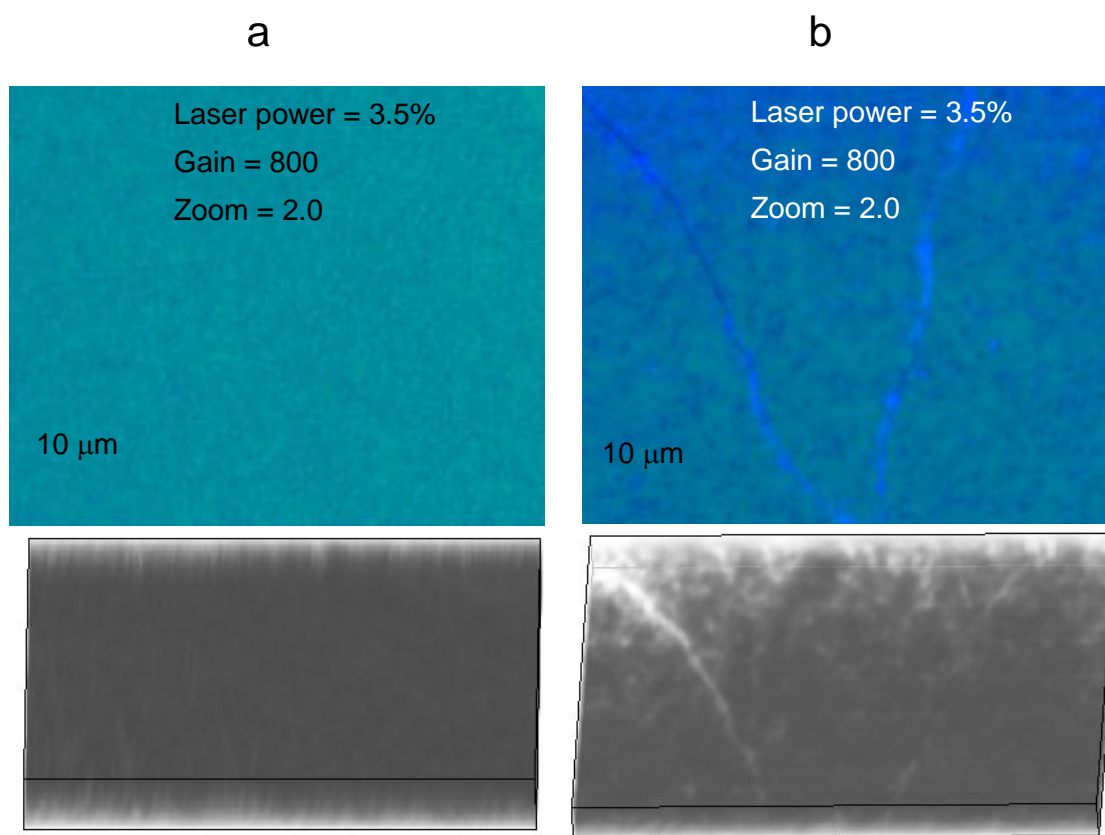

**Figure SI-14-1.** Comparison of two zeolite Y films: the one that is widely used in this study (a) and the other that has deliberately produced microcracks (b). Top: 2D image, Bottom: 3D image

The LSCM measurements were performed on two types of  $Y_{ITO}$  ( $2 \times 2 \text{ cm}^2$ ), one that has been routinely used in this work, the other that have microcracks by generating large amounts of CdS QDs. The films were immersed in a methanol solution of 2-(6-hydroxy-3-oxo-(3H)-xanthen-9-yl) benzoic acid (fluorescein, 0.1M) for 4 days at room temperature. The zeolite-Y films were then washed with a stream of MeOH, dried by blowing  $N_2$  gas, and kept at room temperature for 12 h.

The LSCM measurements were conducted using a LSM 5 Exciter (Carl Zeiss) with an  $Ar^+$  ion laser (488 nm) as the excitation source and with z-stack scan mode. The two types of  $Y_{ITO}$  films were measured under the same condition of the laser power of 3.5 % using Plan-Apochromat 40 $\times$ /0.95 Korr M27 objective lens with the zoom at 2.0 and the master gain at 800. The 3D images were built using ZEN 2009 Light Edition software (Carl Zeiss).



**SI-15 Photovoltaic characteristics of  $(\text{CdS})_{6.3}\text{Y}_{\text{ITO}} \mid \text{Pt}_{\text{FTO}}$  with various thickness.**

\

| Thickness ( $\mu\text{m}$ ) | $I_{\text{sc}}$ ( $\text{mA}/\text{cm}^2$ ) <sup>a</sup> | $V_{\text{oc}}$ (V) <sup>b</sup> | FF <sup>c</sup> | $\eta$ (%) <sup>d</sup> |
|-----------------------------|----------------------------------------------------------|----------------------------------|-----------------|-------------------------|
| 2500                        | 0.30                                                     | 423                              | 28              | 0.10                    |
| 1600                        | 0.25                                                     | 411                              | 30              | 0.07                    |
| 1000                        | 0.17                                                     | 397                              | 28              | 0.04                    |
| 500                         | 0.10                                                     | 384                              | 29              | 0.02                    |
| 350                         | 0.07                                                     | 350                              | 30              | ~0.01                   |

<sup>a</sup>Short circuit current. <sup>b</sup>Open circuit voltage. <sup>c</sup>Fill factor. <sup>d</sup>Efficiency.

**SI-16. Photovoltaic characteristics of (CdS)<sub>6.3</sub>Y<sub>ITO</sub> | Pt<sub>FTO</sub> under different light intensities.**

| Light Intensity | I <sub>sc</sub> (mA/cm <sup>2</sup> ) <sup>a</sup> | V <sub>oc</sub> (V) <sup>b</sup> | FF <sup>c</sup> | η (%) <sup>d</sup> |
|-----------------|----------------------------------------------------|----------------------------------|-----------------|--------------------|
| 1.0 sun         | 0.30                                               | 423                              | 28              | 0.10               |
| 0.5 sun         | 0.18                                               | 415                              | 30              | 0.13               |
| 0.1 sun         | 0.05                                               | 407                              | 28              | 0.15               |

<sup>a</sup>Short circuit current. <sup>b</sup>Open circuit voltage. <sup>c</sup>Fill factor. <sup>d</sup>Efficiency.
